# Supplementary material
Source: PubMed Central journal article supplement (PMC2546934)
Supplement: supp_28_18_5668__1.pdf [file supp_28_18_5668__1.pdf]

The PKC-Responsive Inhibitory Domain of CARD11 Functions in NF- $\kappa$ B Activation to Regulate the Association of Multiple Signaling Cofactors that Differentially Depend on Bcl10 and MALT1 for Association  
 McCully and Pomerantz, 2008  
 Supplementary Figure 1

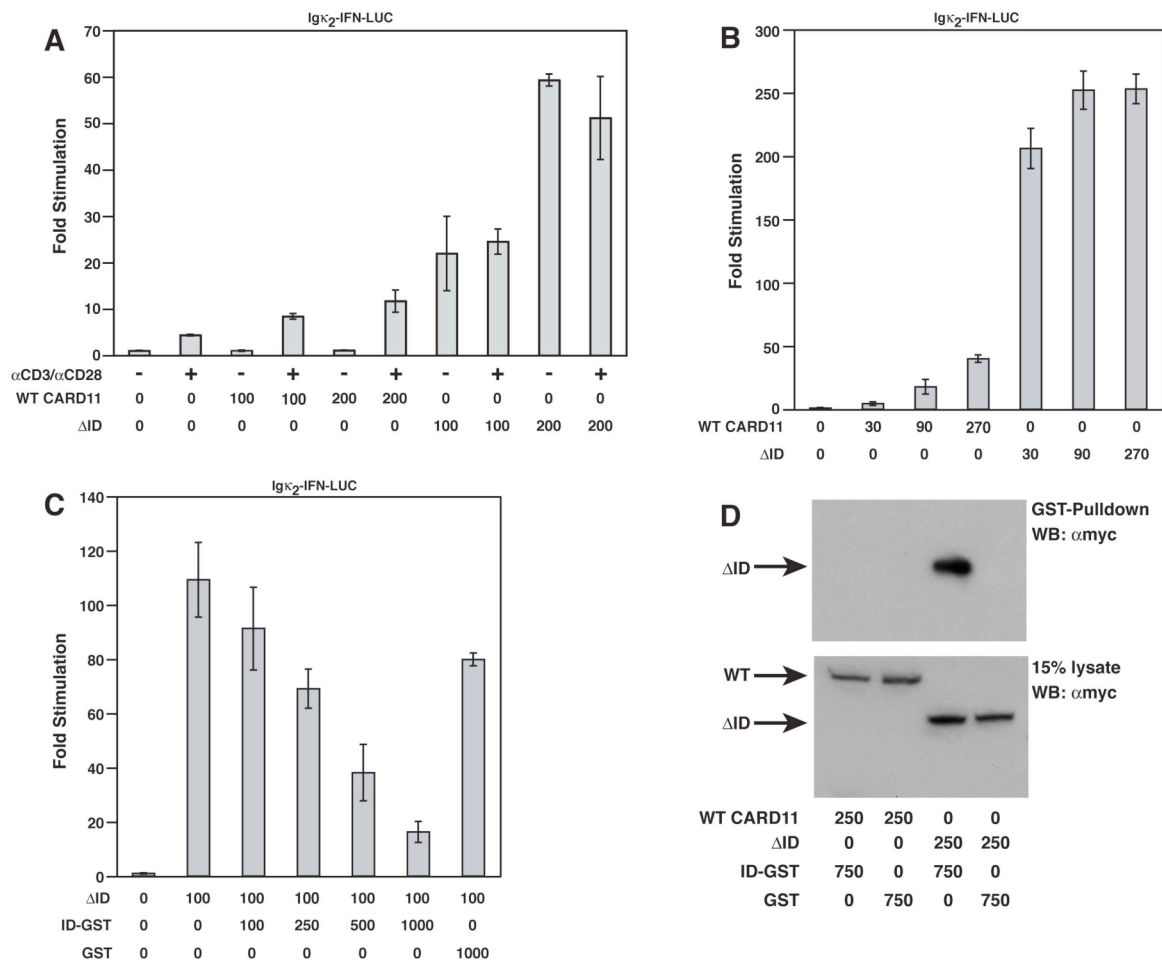

**Function of the CARD11 ID domain *in cis* and *in trans*.** (A) Wild-type Jurkat T cells were transfected with 200 ng pCSK-LacZ and 2500 ng of Ig $\kappa$ <sub>2</sub>-IFN-LUC in the presence of the indicated amounts (in ng) of expression vectors for either wild-type CARD11 or the CARD11 ΔID variant. Cells were stimulated with αCD3/αCD28 crosslinking as indicated. (B) HEK293T cells were transfected with 20 ng pCSK-LacZ and 6 ng of Ig $\kappa$ <sub>2</sub>-IFN-LUC in the presence of the

indicated amounts (in ng) of expression vectors for either wild-type CARD11 or the  $\Delta$ ID. (C) Wild-type Jurkat T cells were transfected with 200 ng pCSK-LacZ and 1700 ng of Ig $\kappa$ <sub>2</sub>-IFN-LUC in the presence of the indicated amounts (in ng) of expression vectors for the  $\Delta$ ID and either GST (pEBG) or the ID-GST fusion (pEBB-HA-ID-GST). (D) HEK293T cells were transfected with the indicated amounts (in ng) of expression vectors for wild-type CARD11, the  $\Delta$ ID, GST (pEBG) or the ID-GST fusion (pc-HA-ID-GST) and glutathione agarose precipitations were performed as described in Materials and Methods. The top panel shows the contents of the precipitate, the lower panel shows the lysate input, developed with  $\alpha$ myc primary. The bars represent the mean values of triplicate samples and error bars indicate the standard deviation.
